# Supplementary material for: Parental Stress Scale: Psychometric Properties in Parents of Preschool Children with Developmental Language Disorder
Source: MDPI journal article supplement (doi:10.3390/healthcare11091332), 2023-05-05
Supplement: s1 [file s1]

**Table S1: Correlation matrix among PSS items, SDQ total score and demographics.**

|            | Network   |            |            |         |         |       |         |         |         |         |        |        |        |        |        |        |        |        |          |          |
|------------|-----------|------------|------------|---------|---------|-------|---------|---------|---------|---------|--------|--------|--------|--------|--------|--------|--------|--------|----------|----------|
| Variable   | Child_sex | Parent_sex | Parent_age | SDQ_tot | PSS_1_R | PSS_3 | PSS_5_R | PSS_6_R | PSS_7_R | PSS_8_R | PSS_9  | PSS_10 | PSS_11 | PSS_12 | PSS_13 | PSS_14 | PSS_15 | PSS_16 | PSS_17_R | PSS_18_R |
| Child_sex  |           |            |            |         | 0.030   |       |         | 0.064   |         |         |        |        |        |        |        |        |        |        |          |          |
| Parent_sex |           |            | 0.258      |         |         |       |         |         |         |         |        |        |        |        |        |        | -0.040 |        |          |          |
| Parent_age |           | 0.258      |            |         |         |       |         |         |         |         |        |        |        |        |        |        |        |        |          |          |
| SDQ_total  |           |            |            |         | 0.142   |       |         |         |         |         |        |        |        | 0.048  | 0.174  | 0.006  |        | 0.084  | 0.074    |          |
| PSS_1_R    |           |            |            | 0.142   |         |       | 0.118   | 0.188   |         |         |        |        |        |        | 0.103  | 0.066  |        |        |          | 0.134    |
| PSS_3      | 0.030     |            |            |         |         |       |         |         |         | 0.017   |        | 0.144  |        | 0.137  |        |        | 0.037  | 0.015  | 0.039    |          |
| PSS_5_R    |           |            |            |         | 0.118   |       |         | 0.194   |         | 0.087   |        |        |        |        |        | 0.016  | 0.117  | 0.067  | 0.060    |          |
| PSS_6_R    |           |            |            |         | 0.188   |       | 0.194   |         | 0.129   | 0.052   |        | 0.042  |        |        | 0.079  | 0.063  | 0.003  | 0.129  | 0.031    | 0.034    |
| PSS_7_R    | 0.064     |            |            |         |         |       |         | 0.129   |         | 0.452   | -0.010 |        |        |        |        |        |        |        |          |          |
| PSS_8_R    |           |            |            |         |         | 0.017 | 0.087   | 0.052   | 0.452   |         |        |        |        |        |        |        |        |        | 0.068    | 0.214    |
| PSS_9      |           |            |            |         |         |       |         |         | -0.010  |         |        | 0.142  |        |        |        |        | 0.014  |        |          |          |
| PSS_10     |           |            |            |         |         | 0.144 |         | 0.042   |         |         | 0.142  |        | 0.142  | 0.241  |        |        |        | 0.104  | 0.040    |          |
| PSS_11     |           |            |            |         |         |       |         |         |         |         |        | 0.142  |        | 0.135  | 0.076  |        | 0.147  |        |          |          |
| PSS_12     |           |            |            |         |         |       | 0.137   |         |         |         |        | 0.241  | 0.135  |        |        |        | 0.061  | 0.163  |          |          |
| PSS_13     |           |            |            | 0.048   |         |       |         | 0.079   |         |         |        |        | 0.076  |        |        |        | 0.118  | 0.087  | 0.088    | 0.115    |
| PSS_14     |           |            |            | 0.174   | 0.103   |       | 0.016   | 0.063   |         |         |        |        |        |        |        |        | 0.122  |        | 0.068    | 0.024    |
| PSS_15     |           | -0.040     |            | 0.006   | 0.066   | 0.037 | 0.117   | 0.003   |         | 0.014   |        | 0.147  | 0.061  | 0.118  | 0.122  |        |        | 0.205  | 0.003    |          |
| PSS_16     |           |            |            |         |         | 0.015 | 0.067   | 0.129   |         |         |        | 0.104  |        | 0.163  | 0.087  |        | 0.205  |        | 0.093    | 0.011    |
| PSS_17_R   |           |            |            | 0.084   |         | 0.039 | 0.060   | 0.031   |         | 0.068   |        | 0.040  |        |        | 0.088  | 0.068  | 0.003  | 0.093  |          | 0.063    |
| PSS_18_R   |           |            |            | 0.074   | 0.134   |       |         | 0.034   |         | 0.214   |        |        |        |        | 0.115  | 0.024  |        | 0.011  | 0.063    |          |
